# Supplementary material for: High expression of PPFIA1 in human esophageal squamous cell carcinoma correlates with tumor metastasis and poor prognosis
Source: PubMed Central journal article supplement (PMC10169376; doi:10.1186/s12885-023-10872-9), 2023-05-09
Supplement: 12885_2023_10872_MOESM1_ESM.pdf [file 12885_2023_10872_MOESM1_ESM.pdf]

**Supplementary Table 1** Oncomine analysis of *PPFIA1* mRNA expression in esophageal cancer

| Cohort No. | Cohort                | Data type | Sample (n)                                              | Fold change | <i>P</i> value |
|------------|-----------------------|-----------|---------------------------------------------------------|-------------|----------------|
| 1          | Hu Esophagus (34)     | mRNA      | Esophageal squamous cell carcinoma (17) vs. normal (17) | 3.745       | 7.60E-06       |
| 2          | Su Esophagus 2 (106)  | mRNA      | Esophageal squamous cell carcinoma (53) vs. normal (53) | 2.257       | 4.14E-10       |
| 3          | Wang Esophagus (52)   | mRNA      | Barrett's esophagus (19) vs. normal (24)                | 1.268       | 3.20E-02       |
| 4          | Hu Esophagus 2 (132)  | DNA       | Esophageal squamous cell carcinoma (30) vs. blood (102) | 1.845       | 5.11E-06       |
| 5          | Kimchi Esophagus (24) | mRNA      | Esophageal adenocarcinoma (8) vs. normal (8)            | 2.091       | 1.60E-02       |
| 6          | Kim Esophagus (118)   | mRNA      | Esophageal adenocarcinoma (75) vs. normal (28)          | 1.337       | 7.75E-06       |
|            |                       |           | Barrett's esophagus (15) vs. normal (28)                | 1.344       | 1.00E-03       |

**Abbreviations:** PPFIA1, PTPRF interacting protein alpha 1
