# Supplementary material for: High expression of PPFIA1 in human esophageal squamous cell carcinoma correlates with tumor metastasis and poor prognosis
Source: PubMed Central journal article supplement (PMC10169376; doi:10.1186/s12885-023-10872-9), 2023-05-09
Supplement: 12885_2023_10872_MOESM2_ESM.pdf [file 12885_2023_10872_MOESM2_ESM.pdf]

**Supplementary Table 2** Correlations between *PPF1A1* mRNA expression and clinicopathological variables in 67 ESCC patients in the cDNA array dataset

| Clinicopathological variables | Number | PPF1A1 expression |            | $\chi^2$ | P value      |
|-------------------------------|--------|-------------------|------------|----------|--------------|
|                               |        | Low               | High       |          |              |
| Gender                        |        |                   |            | 0.038    | 0.846        |
| Male                          | 48     | 24 (50.0%)        | 24 (50.0%) |          |              |
| Female                        | 19     | 10 (52.6%)        | 9 (47.4%)  |          |              |
| Age (years)                   |        |                   |            | 0.726    | 0.394        |
| ≤60                           | 42     | 23 (54.8%)        | 19 (45.2%) |          |              |
| >60                           | 25     | 11 (44.0%)        | 14 (56.0%) |          |              |
| Histological grade            |        |                   |            | 4.632    | <b>0.031</b> |
| I/II                          | 57     | 32 (56.1%)        | 25 (43.9%) |          |              |
| III                           | 9      | 1 (11.1%)         | 8 (88.9%)  |          |              |
| unknown                       | 1      |                   |            |          |              |
| Tumor invasion depth          |        |                   |            | 0.111    | 0.739        |
| T1- T2                        | 15     | 9 (60.0%)         | 6 (40.0%)  |          |              |
| T3-T4                         | 40     | 22 (55.0%)        | 18 (45.0%) |          |              |
| unknown                       | 12     |                   |            |          |              |
| Lymph node metastasis         |        |                   |            | 1.018    | 0.313        |
| None                          | 33     | 18 (54.5%)        | 15 (45.5%) |          |              |
| Yes                           | 31     | 13 (41.9%)        | 18 (58.1%) |          |              |
| unknown                       | 3      |                   |            |          |              |
| M status                      |        |                   |            | 0.000    | 1.000        |
| M0                            | 62     | 31 (50.0%)        | 31 (50.0%) |          |              |
| M1                            | 5      | 3 (60.0%)         | 2 (40.0%)  |          |              |
| TNM stage                     |        |                   |            | 1.480    | 0.224        |
| I/II                          | 27     | 16 (59.3%)        | 11 (40.7%) |          |              |
| III/IV                        | 28     | 12 (42.9%)        | 16 (57.1%) |          |              |
| unknown                       | 12     |                   |            |          |              |

**Abbreviations:** PPF1A1, PTPRF interacting protein alpha 1; ESCC, esophageal squamous cell carcinoma; TNM, tumor-node-metastasis.
