# Supplementary material for: High expression of PPFIA1 in human esophageal squamous cell carcinoma correlates with tumor metastasis and poor prognosis
Source: PubMed Central journal article supplement (PMC10169376; doi:10.1186/s12885-023-10872-9), 2023-05-09
Supplement: 12885_2023_10872_MOESM3_ESM.pdf [file 12885_2023_10872_MOESM3_ESM.pdf]

A

Breast cancer

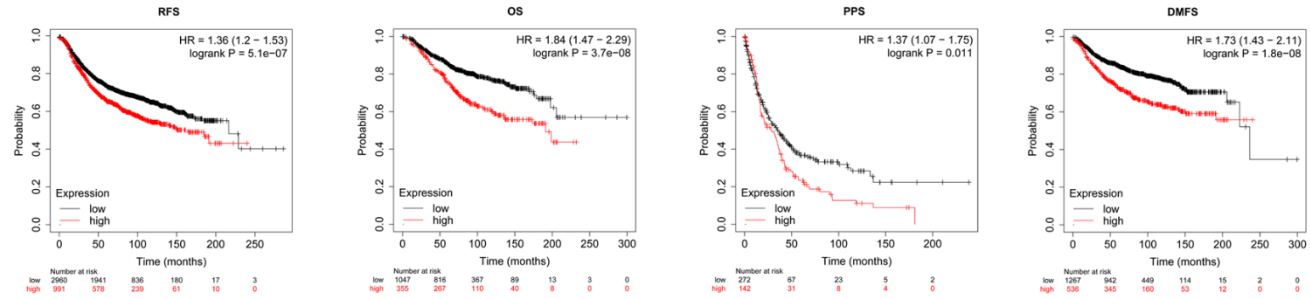

B

Ovarian cancer

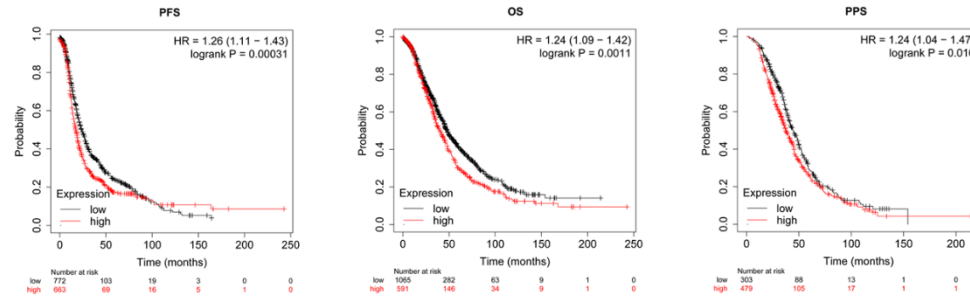

C

Lung cancer

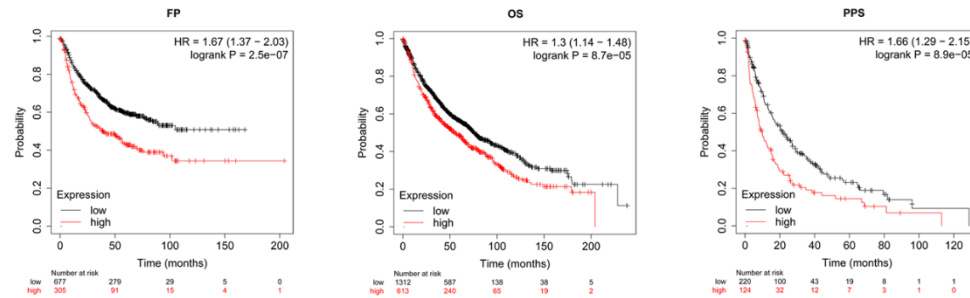

D

Gastric cancer

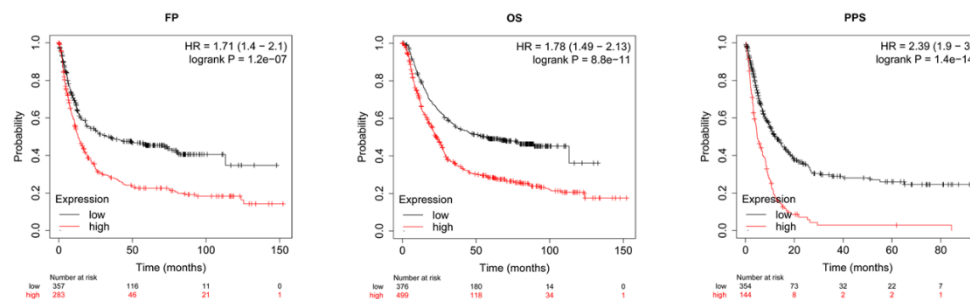

**Supplementary Fig. 1** The correlations between PPFIA1 expression and the prognoses of patients with malignancies were analyzed using Kaplan-Meier Plotter. Correlation of PPFIA1 expression with the RFS, OS, PPS, and DMFS of breast cancer patients (A); PFS, OS, and PPS of ovarian cancer patients (B); FP, OS, and PPS of lung cancer patients (C); and FP, OS, and PPS of gastric cancer patients (D).
